# Supplementary material for: Estimating the Risk of Developing Type 2 Diabetes: A Comparison of Several Risk Scores: The Cohorte Lausannoise study
Source: PubMed Central journal article supplement — Diabetes Care. 2011 Jul 16;34(8):1863–8. doi: 10.2337/dc11-0206 (PMC3142037; doi:10.2337/dc11-0206), 2011-07-16
Supplement: supp_dc11-0206v110206_DC110206SupplementaryData.pdf [file supp_dc11-0206v110206_DC110206SupplementaryData.pdf]

SUPPLEMENTARY DATA

**Supplementary Table 1.** characteristics of the risk scores

|                               | <b>Wilson</b> | <b>Balkau (C)</b>                       | <b>Kahn (C)</b> | <b>Swiss Diabetes Association</b> | <b>Kahn (CB)</b> | <b>FINDRISC</b> | <b>Griffin</b>       |
|-------------------------------|---------------|-----------------------------------------|-----------------|-----------------------------------|------------------|-----------------|----------------------|
| Study                         | Framingham    | DESIR                                   | ARIC            | FINRISK                           | ARIC             | FINRISK         | Ely and Wessex Study |
| Country                       | USA           | France                                  | USA             | Finland                           | USA              | Finland         | England              |
| Number of patients            | 3,140         | 3,817                                   | 12,729          | 4,435                             | 12,729           | 4,435           | 1,077                |
| Patients age (years) *        | 54.0 (9.8)    | 30 - 65                                 | 45 - 64         | 25 - 64                           | 45 - 64          | 25 - 64         | 40 - 64              |
| Follow-up (years)             | 8 y           | 9 y                                     | 10 y            | 5 – 10 y                          | 10 y             | 5 -10 y         | 0 <sup>†</sup>       |
| Threshold to define high risk | 33%           | 30%                                     | 33%             | 15 points                         | 46%              | 12 points       | 37%                  |
| AROC                          | 0.85          | 0.713 <sup>‡</sup> - 0.827 <sup>§</sup> | 0.71            | 0.86                              | 0.79             | 0.86            | 0.8                  |

\* mean (SD) or range

† cross-sectional study

‡ men

§ women

AROC : Area Under the ROC Curve

C : clinical, CB : clinical and biological (only specified in case of various equations provided by the authors)

SUPPLEMENTARY DATA

**Supplementary Table 2.** Variables used in the risk scores for type 2 diabetes

|                             | Wilson | Balkau (C)     | Kahn (C) | Swiss Diabetes Association | Kahn (CB) | FINDRISC | Griffin |
|-----------------------------|--------|----------------|----------|----------------------------|-----------|----------|---------|
| Age                         |        |                | X        | X                          | X         | X        | X       |
| Sex                         |        |                |          |                            |           |          | X       |
| Genetics                    |        |                |          |                            |           |          |         |
| Familial history            | X      | X <sup>*</sup> | X        | X                          | X         |          | X       |
| Personal history            |        |                |          | X                          |           | X        |         |
| Black race                  |        |                | X        |                            | X         |          |         |
| Lifestyle                   |        |                |          |                            |           |          |         |
| Smoking                     |        | X <sup>†</sup> | X        |                            |           |          | X       |
| Drinking                    |        |                |          |                            | X         |          |         |
| Eating                      |        |                |          | X                          |           | X        |         |
| Physical activity           |        |                |          | X                          |           | X        |         |
| Anthropometry               |        |                |          |                            |           |          |         |
| BMI                         | X      |                |          | X                          |           | X        | X       |
| Weight                      |        |                | X        |                            |           |          |         |
| Height                      |        |                | X        |                            | X         |          |         |
| Waist circumference         |        | X              | X        | X                          | X         | X        |         |
| Cardiovascular risk factors |        |                |          |                            |           |          |         |
| Resting pulse               |        |                | X        |                            | X         |          |         |
| Hypertension                | X      | X              | X        | X                          | X         | X        | X       |
| HDL-Cholesterol             | X      |                |          |                            | X         |          |         |
| Triglycerides               | X      |                |          |                            | X         |          |         |
| Other                       |        |                |          |                            | X         |          | X       |
| Fasting glucose             | X      |                |          |                            | X         |          |         |
| Prescribed Steroids         |        |                |          |                            |           |          | X       |
| Uric acid                   |        |                |          |                            | X         |          |         |
| Number of variables         | 5      | 4              | 9        | 8                          | 11        | 7        | 7       |

\* women only

† men only

C : clinical, CB : clinical and biological (only specified in case of various equations provided by the authors)

SUPPLEMENTARY DATA

**Supplementary Table 3.** Characteristics of the non-diabetic patients assessed by the scoring systems

|                                     | <b>Men<br/>(N=2,650)</b> | <b>Women<br/>(N=3,110)</b> | <b>p value</b> |
|-------------------------------------|--------------------------|----------------------------|----------------|
| Age                                 | 51.8 ± 10.7              | 53.2 ± 10.7                | < 0.0001       |
| Familial history, n (%)             | 505 (19.1)               | 696 (22.4)                 | 0.002          |
| Personal history,(anamnèse) n (%)   | 17 (0.6)                 | 22 (0.7)                   | 0.932          |
| Personal history (gluc>=5.55) n (%) | 1,214 (45.8)             | 727 (23.4)                 | <0.001         |
| Smoking, n (%)                      | 780 (29.4)               | 785 (25.2)                 | < 0.001        |
| Drinking, n (%)                     | 2,236 (84.4)             | 1,978 (63.6)               | < 0.001        |
| Not Drinking, n (%)                 | 414 (15.6)               | 1,132 (36.4)               | < 0.001        |
| Physical activity, n (%)            | 1,453 (54.8)             | 1,806 (58.1)               | 0.013          |
| Steroids Prescription, n (%)        | 34 (1.3)                 | 35 (1.1)                   | 0.584          |
| BMI (kg/m <sup>2</sup> )            | 26.2 ± 3.7               | 24.9 ± 4.6                 | < 0.0001       |
| Weight (kg)                         | 80.5 ± 12.6              | 65.9 ± 12.2                | <0.0001        |
| Height (cm)                         | 175.1 ± 7.1              | 162.8 ± 6.7                | <0.0001        |
| Waist circumference (cm)            | 94.7 ± 10.5              | 82.8 ± 11.7                | < 0.0001       |
| Resting pulse (bpm)                 | 67 ± 10                  | 68 ± 9                     | <0.0001        |
| Hypertension, n (%)                 | 1,500 (56.6)             | 1,317 (42.4)               | < 0.0001       |
| Fasting glucose (mmol/l)            | 5.52 ± 0.54              | 5.21 ± 0.52                | < 0.0001       |
| HDL-Cholesterol (mmol/l)            | 1.46 ± 0.36              | 1.82 ± 0.42                | < 0.0001       |
| Triglycerides (mmol/l)              | 1.60 ± 1.42              | 1.13 ± 0.58                | < 0.0001       |
| Uric acid (µmol/l)                  | 359.1 ± 73.7             | 268.1 ± 64.8               | <0.0001        |

SUPPLEMENTARY DATA

**Supplementary Table 4.** Proportion of high-risk participants according to each score (expressed in percentage and 95% confidence interval)

|                    | <b>Wilson</b>    | <b>Balkau (C)</b> | <b>Kahn (C)</b>     | <b>Swiss Diabetes Association</b> | <b>Kahn (CB)</b>    | <b>FINDRISC</b>     | <b>Griffin</b>      |
|--------------------|------------------|-------------------|---------------------|-----------------------------------|---------------------|---------------------|---------------------|
| Overall (N=5760)   |                  |                   |                     |                                   |                     |                     |                     |
| Men                | 1.6<br>(1.2-2.2) | 4.2<br>(3.4-5.0)  | 12.8<br>(11.5-14.1) | 13.5<br>(12.2-14.9)               | 13.7<br>(12.4-15.0) | 22.9<br>(21.3-24.5) | 24.9<br>(23.4-26.6) |
| Women              | 1.1<br>(0.8-1.6) | 2.9<br>(2.4-3.6)  | 6.0<br>(5.2-6.9)    | 11.1<br>(10.0-12.3)               | 6.1<br>(5.3-7.0)    | 15.7<br>(14.5-17.1) | 10.7<br>(9.6-11.8)  |
| <65 years (N=4916) |                  |                   |                     |                                   |                     |                     |                     |
| Men                | 1.8<br>(1.3-2.4) | 3.6<br>(2.9-4.5)  | 11.8<br>(10.5-13.1) | 10.9<br>(9.6-12.2)                | 12.8<br>(11.5-14.2) | 18.9<br>(17.3-20.6) | 18.8<br>(17.2-20.5) |
| Women              | 1.2<br>(0.8-1.7) | 2.7<br>(2.1-3.4)  | 6.0<br>(5.1-7.0)    | 9.2<br>(8.1-10.4)                 | 5.8<br>(5.0-6.8)    | 13.1<br>(11.9-14.5) | 7.8<br>(6.8-8.9)    |

C : clinical, CB : clinical and biological (only specified in case of various equations provided by the authors)

SUPPLEMENTARY DATA

**Supplementary Table 5.** Proportion of participants at high risk of developing type 2 diabetes according to each score, by gender and age group

|              | <b>Wilson</b> | <b>Balkau (C)</b> | <b>Kahn (C)</b> | <b>Swiss Diabetes Association</b> | <b>Kahn (CB)</b> | <b>FINDRISC</b> | <b>Griffin</b> |
|--------------|---------------|-------------------|-----------------|-----------------------------------|------------------|-----------------|----------------|
| <b>Men</b>   |               |                   |                 |                                   |                  |                 |                |
| 35-44 y      | 0.8           | 2.0               | 6.1             | 3.1                               | 5.6              | 4.8             | 5.86           |
| 45-54 y      | 2.3           | 3.0               | 8.9             | 11.2                              | 12.1             | 17.3            | 16.21          |
| 55-64 y      | 2.5           | 6.7               | 22.9            | 21.0                              | 23.3             | 39.9            | 39.56          |
| 65-75 y      | 0.5           | 7.3               | 19.0            | 29.8                              | 19.0             | 37.4            | 62.6           |
| Total        | 1.6           | 4.2               | 12.8            | 13.5                              | 13.7             | 22.9            | 24.9           |
| <b>Women</b> |               |                   |                 |                                   |                  |                 |                |
| 35-44 y      | 0.7           | 1.4               | 2.6             | 1.9                               | 1.6              | 3.5             | 1.29           |
| 45-54 y      | 1.0           | 2.3               | 3.9             | 7.3                               | 4.6              | 10.9            | 5.06           |
| 55-64 y      | 1.8           | 4.5               | 11.4            | 18.1                              | 11.0             | 24.6            | 16.74          |
| 65-75 y      | 0.8           | 4.0               | 6.3             | 21.9                              | 7.8              | 30.1            | 26.74          |
| Total        | 1.1           | 2.9               | 6.0             | 11.1                              | 6.1              | 15.7            | 10.7           |

C : clinical, CB : clinical and biological (only specified in case of various equations provided by the authors)

SUPPLEMENTARY DATA

**Supplementary Table 6.** Comparison of gender and age distributions between the CoLaus sample and the Swiss population for years 2003-6.

|           | CoLaus sample (n=6,188) | Swiss population 2003-6<br>(average N=3.846 million) |
|-----------|-------------------------|------------------------------------------------------|
| Women (%) | 3,251 (52.5)            | 50.7                                                 |
| Age group |                         |                                                      |
| 35-44     | 2,051 (33.1)            | 32.2                                                 |
| 45-54     | 1,682 (27.2)            | 27.4                                                 |
| 55-64     | 1,657 (26.8)            | 23.2                                                 |
| 65-75     | 798 (12.9)              | 17.3                                                 |

Data for Switzerland obtained from the Federal Bureau of Statistics

<http://www.bfs.admin.ch/bfs/portal/fr/index/themen/01/02/blank/data/01.html>

**Supplementary Table 7.** Effect of reducing the Swiss Diabetes Association and FINDRISC scoring system cut-off points in the prevalence of subjects at risk of developing type 2 diabetes.

|                       | Swiss Diabetes Association | FINDRISC         |
|-----------------------|----------------------------|------------------|
| Men (N=2,650)         |                            |                  |
| -1 point (this study) | 13.5 (12.2-14.9)           | 22.9 (21.3-24.5) |
| -2 points             | 18.2 (16.7-19.7)           | 29.0 (27.3-30.8) |
| -3 points             | 22.8 (21.2-24.4)           | 33.8 (32.0-35.6) |
| Women (N=3,110)       |                            |                  |
| -1 point (this study) | 11.1 (10.0-12.3)           | 15.7 (14.5-17.1) |
| -2 points             | 14.8 (13.5-16.1)           | 20.2 (18.8-21.6) |
| -3 points             | 18.0 (16.6-19.4)           | 24.4 (22.9-25.9) |

Results are expressed in percentage and 95% confidence interval for all subjects
